# Supplementary material for: Swine Workers and Swine Influenza Virus Infections
Source: PubMed Central journal article supplement (PMC2876739; doi:10.3201/eid1312.061323), 2007-12
Supplement: 06-1323_appT-s1.pdf [file 06-1323_appT-s1.pdf]

Appendix Table. Risk factor analyses for an increase in antibody titer (at any point from enrollment to 24-month follow-up) against swine influenza virus among AHS participants\*

| Variables                                                                  | Total sample | Swine influenza (H1N1), 4-fold increase† |                        |                      | Swine influenza (H1N1), greatest increase‡ |               |               |                |                        |                      |
|----------------------------------------------------------------------------|--------------|------------------------------------------|------------------------|----------------------|--------------------------------------------|---------------|---------------|----------------|------------------------|----------------------|
|                                                                            |              | n (%)                                    | Unadjusted OR (95% CI) | Adjusted OR (95% CI) | 2-fold, n (%)                              | 4-fold, n (%) | 6-fold, n (%) | ≥8-fold, n (%) | Unadjusted OR (95% CI) | Adjusted OR (95% CI) |
| Age (continuous)                                                           | 726          | 180 (24.8)                               | 1 (0.98–1.01)          | –                    | 226 (31.1)                                 | 128 (17.6)    | 37 (5.1)      | 15 (2.1)       | 1 (0.98–1.01)          | –                    |
| Sex                                                                        |              |                                          |                        |                      |                                            |               |               |                |                        |                      |
| Male                                                                       | 419          | 129 (30.8)                               | 2.2 (1.6–3.2)          | 2.2 (1.6–3.2)        | 144 (34.4)                                 | 96 (22.9)     | 23 (5.5)      | 10 (2.4)       | 2.3 (1.8–3.1)          | 2.3 (1.8–3.1)        |
| Female                                                                     | 307          | 51 (16.6)                                | Ref                    | Ref                  | 82 (26.7)                                  | 32 (10.4)     | 14 (4.6)      | 5 (1.6)        | Ref                    | Ref                  |
| Exposure to swine during follow-up                                         |              |                                          |                        |                      |                                            |               |               |                |                        |                      |
| Swine exposure                                                             |              |                                          |                        |                      |                                            |               |               |                |                        |                      |
| AHS swine-exposed at enrollment                                            | 650          | 171 (26.3)                               | 2.6 (1.3–5.4)          | –                    | 204 (31.4)                                 | 123 (18.9)    | 33 (5.1)      | 15 (2.3)       | 2 (1.3–3.2)            | –                    |
| AHS nonswine-exposed at enrollment                                         | 75           | 9 (12)                                   | Ref                    | –                    | 22 (29.3)                                  | 5 (6.7)       | 4 (5.3)       | 0 (0)          | Ref                    | –                    |
| Exposure to swine during follow-up                                         |              |                                          |                        |                      |                                            |               |               |                |                        |                      |
| Exposed                                                                    | 339          | 92 (27.1)                                | 1.3 (0.9–1.8)          | –                    | 113 (33.3)                                 | 69 (20.4)     | 15 (4.4)      | 8 (2.4)        | 1.3 (1–1.7)            | –                    |
| Not exposed                                                                | 387          | 88 (22.7)                                | Ref                    | –                    | 113 (29.2)                                 | 59 (15.3)     | 22 (5.7)      | 7 (1.8)        | Ref                    | –                    |
| Use of gloves when working with pigs                                       |              |                                          |                        |                      |                                            |               |               |                |                        |                      |
| Never wears gloves                                                         | 102          | 25 (24.5)                                | 1 (0.6–1.6)            | –                    | 23 (22.6)                                  | 19 (18.6)     | 4 (3.9)       | 2 (2)          | 0.7 (0.5–1.1)          | –                    |
| Not exposed to pigs or exposed to pigs and wears gloves at least sometimes | 624          | 155 (24.8)                               | Ref                    | –                    | 203 (32.5)                                 | 109 (17.5)    | 33 (5.3)      | 13 (2.1)       | Ref                    | –                    |
| No. of pigs on farm‡                                                       |              |                                          |                        |                      |                                            |               |               |                |                        |                      |
| <400                                                                       | 463          | 120 (25.9)                               | 2.2 (1.2–4.3)          | –                    | 149 (32.2)                                 | 85 (18.4)     | 25 (5.4)      | 10 (2.2)       | 1.9 (1.2–3)            | –                    |
| ≥400                                                                       | 174          | 48 (27.6)                                | 2.4 (1.2–4.9)          | –                    | 51 (29.3)                                  | 36 (20.7)     | 8 (4.6)       | 4 (2.3)        | 1.9 (1.2–3.1)          | –                    |
| Never directly exposed to pigs                                             | 89           | 12 (13.5)                                | Ref                    | –                    | 26 (29.2)                                  | 7 (7.9)       | 4 (4.5)       | 1 (1.1)        | Ref                    | –                    |

|                                                                                 |     |               |               |   |               |               |          |          |               |   |  |
|---------------------------------------------------------------------------------|-----|---------------|---------------|---|---------------|---------------|----------|----------|---------------|---|--|
| Works with nursery pigs§                                                        |     |               |               |   |               |               |          |          |               |   |  |
| Yes                                                                             | 559 | 131<br>(23.4) | 1.3 (0.9–1.9) | – | 164<br>(29.3) | 93<br>(16.6)  | 29 (5.2) | 9 (1.6)  | 1.5 (1.1–2.1) | – |  |
| No                                                                              | 723 | 178<br>(24.6) | Ref           | – | 225<br>(31.1) | 126<br>(17.4) | 37 (5.1) | 15 (2.1) | Ref           | – |  |
| Works with finishing pigs§                                                      |     |               |               |   |               |               |          |          |               |   |  |
| Yes                                                                             | 262 | 73<br>(27.9)  | 1.3 (0.9–1.9) | – | 91<br>(34.7)  | 54<br>(20.6)  | 12 (4.6) | 7 (2.7)  | 1.4 (1.1–1.9) | – |  |
| No                                                                              | 461 | 105<br>(22.8) | Ref           | – | 134<br>(29.1) | 72<br>(15.6)  | 25 (5.4) | 8 (1.7)  | Ref           | – |  |
| Flu vaccination                                                                 |     |               |               |   |               |               |          |          |               |   |  |
| Vaccinated at least 1 of last 2 winters but otherwise not since 2001            | 168 | 38<br>(22.6)  | 0.8 (0.5–1.3) | – | 58<br>(34.5)  | 22<br>(13.1)  | 14 (8.3) | 2 (1.2)  | 1 (0.7–1.4)   | – |  |
| Vaccinated at least 1 of last 2 winters and at least once other time since 2001 | 183 | 46<br>(25.1)  | 0.9 (0.6–1.5) | – | 61<br>(33.3)  | 35<br>(19.1)  | 8 (4.4)  | 3 (1.6)  | 1 (0.7–1.4)   | – |  |
| Vaccinated at least once since 2001 but not last winter                         | 98  | 27<br>(27.6)  | 1.1 (0.6–1.8) | – | 22<br>(22.5)  | 22<br>(22.5)  | 3 (3.1)  | 2 (2)    | 0.8 (0.5–1.3) | – |  |
| Vaccinated before 2001 but none since                                           | 50  | 9 (18)        | 0.6 (0.3–1.3) | – | 16 (32)       | 6 (12)        | 2 (4)    | 1 (2)    | 0.7 (0.4–1.3) | – |  |
| No/unknown                                                                      | 227 | 60<br>(26.4)  | Ref           | – | 69<br>(30.4)  | 43<br>(18.9)  | 10 (4.4) | 7 (3.1)  | Ref           | – |  |
| Human antibody titer to (H1N1)                                                  |     |               |               |   |               |               |          |          |               |   |  |
| ≥4-fold increase                                                                | 32  | 9<br>(28.1)   | 1.2 (0.5–2.6) | – | 9 (28.1)      | 6 (18.8)      | 2 (6.3)  | 1 (3.1)  | 1.1 (0.6–2.1) | – |  |
| <4-fold increase                                                                | 694 | 171<br>(24.6) | Ref           | – | 217<br>(31.3) | 122<br>(17.6) | 35 (5)   | 14 (2)   | Ref           | – |  |

\*AHS, Agricultural Health Study; OR, odds ratio; CI, confidence interval; Ref, Ref. Final multivariable models were designed using a saturated model with all the variables included in this table, and manual backwards elimination.

†Binary logistic regression modeling. a 4-fold increase at any time from enrollment to 24-month follow-up, among participants who permitted sera collections at least 2 times during the study.

‡Proportional odds modeling. The maximum increase in antibody titers from enrollment to 24-month follow-up, for each participant who permitted sera collections at least 2 times during the study. Grouping upper antibody titer levels when sparse, not to reject model assumption with the proportional odds score test. Greatest number of animals on farm during follow-up years.

§Based upon enrollment questionnaire. Summary counts that do not add up to 726 reflect missing data.
